# Supplementary material for: Polyoxometalates with supporting phosphate ligand: synthesis and characterization of α-[SiW11O39M(H2PO4)]n−
Source: Royal Society of Chemistry journal article supplement (doi:10.1039/b307947n), 2003-01-01

**Synthesis.**

K4H3[SiW11O39Mn(H2PO4)] (SiW11Mn-PO4 for short). The preparation procedure was similar to that for SiW11Co-PO4, except that MnSO4 was used. The product was yellow precipitate (3.5g, 1.1 mmol). Yellow rhombus crystalline was harvested by re-crystallization in a solution containing quarter volume of acetonitrile.

K5H2[SiW11O39Ni(H2PO4)] (SiW11Ni-PO4 for short). The preparation procedure was similar to that for SiW11Co-PO4. The difference was in that green oil rather than precipitate deposited upon additions of KCl and water/acetone solution. The oil was isolated by decanting solution and solidified by addition of a solution of water/ethanol to get green powder (2.9g, 0.9 mmol). The powder was purified through repeating the steps of dissolution and extraction, using distillation water and ethanol alternatively.

K3H3[SiW11O39Cr(H2PO4)] (SiW11Cr-PO4 for short). The preparation procedure was similar to that for SiW11Co-PO4. During addition of SiW11 the formation of a bean-green precipitate should be avoided as the precipitate might be a [Cr(AMP)]+ salt of monosubstituted tungtosilicate (deduced from its IR spectrum). KCl(1g), then a little amount of ethanol, was added into the filtrate. Green needle crystals (1g, 0.3mmol) were harvested from the solution after several days’ standing.


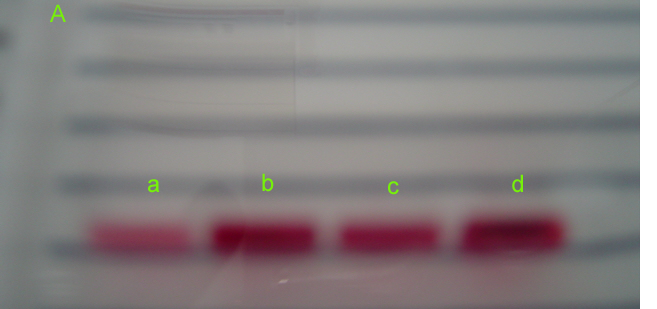

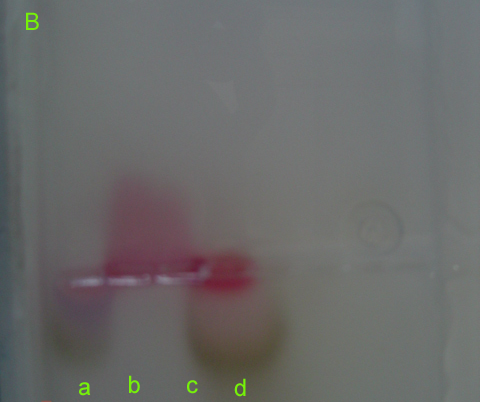


S.Fig.1Photos of electrophoresis for solutions of (a) Co3(PO4)2 (a little amount of diluted H3PO4 was added to dissolve it), (b) SiW11Co-PO4, (c) SiW11Co, and (d) Co(NO3)2: A, before electrophoresis; B, after 10 min′s electrophoresis.

S.Fig.2 TLC photo taken after 40min′s immersing for thin-layer plate of Al2O3: (a) Co3(PO4)2; (b) SiW11Co; (c) SiW11Co-PO4.


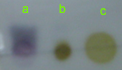


S.Fig. 3 A typical IR spectrum of [SiW11O39M(H2PO4)]n-, here M=CoII


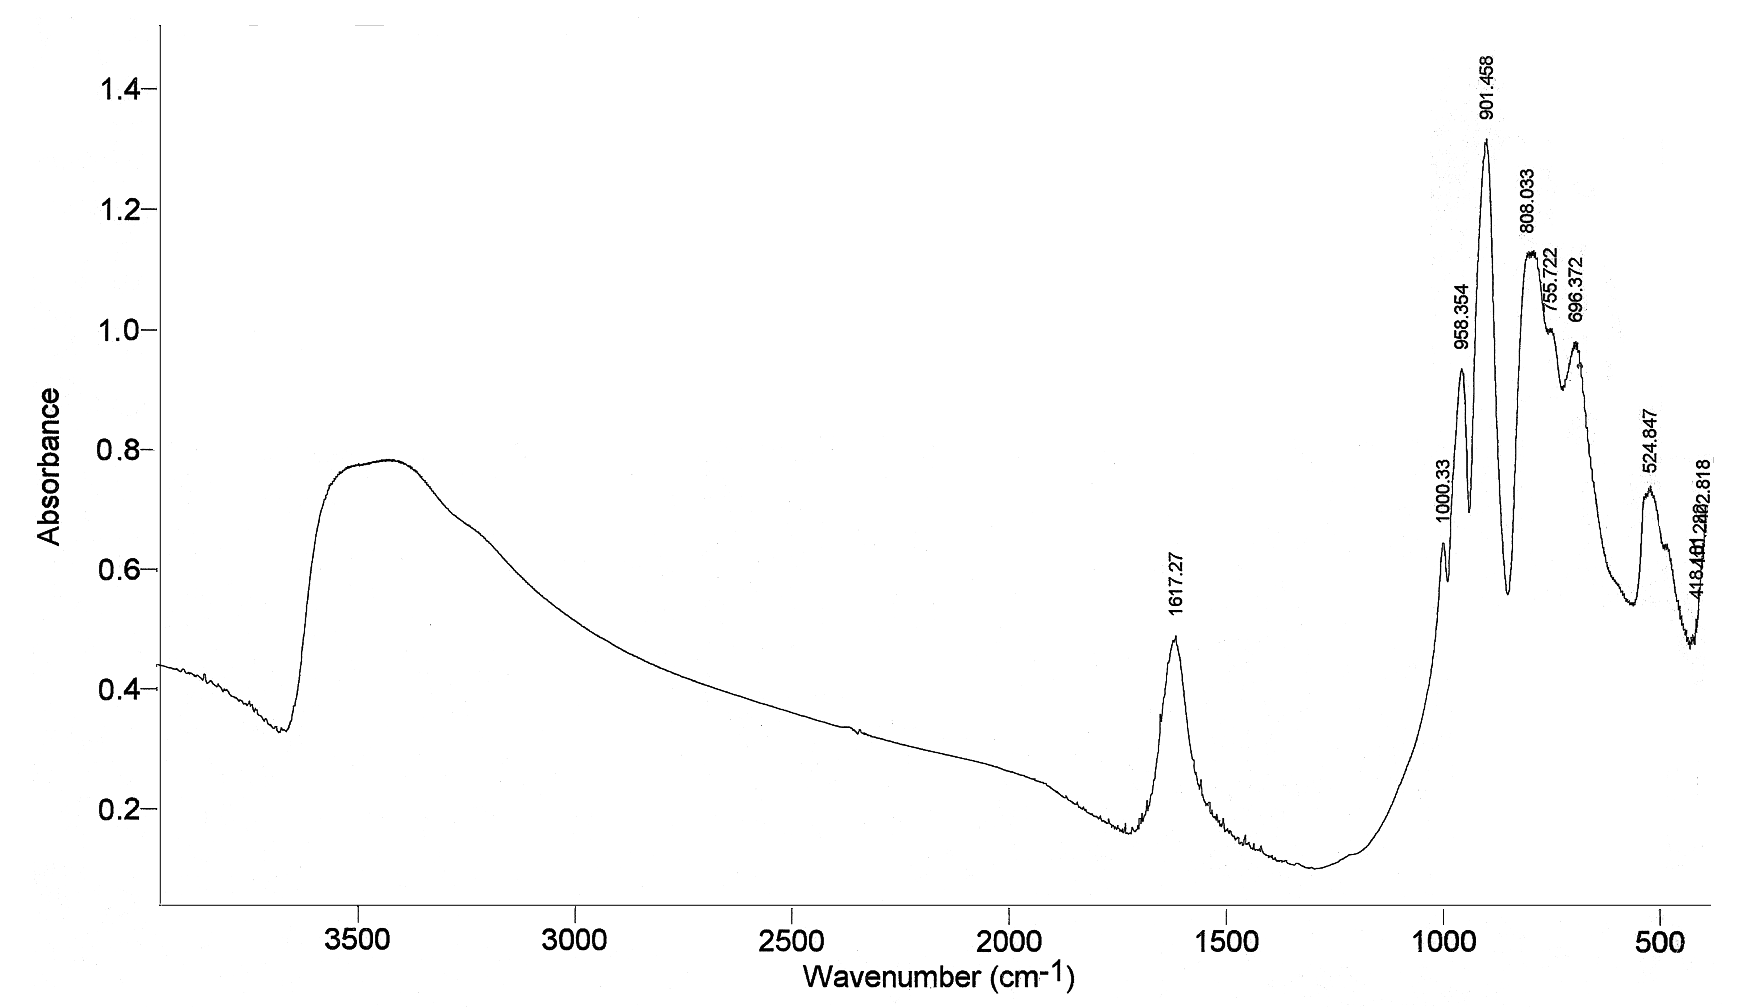


S. Fig.4 IR spectrum of [SiW11O39]8-


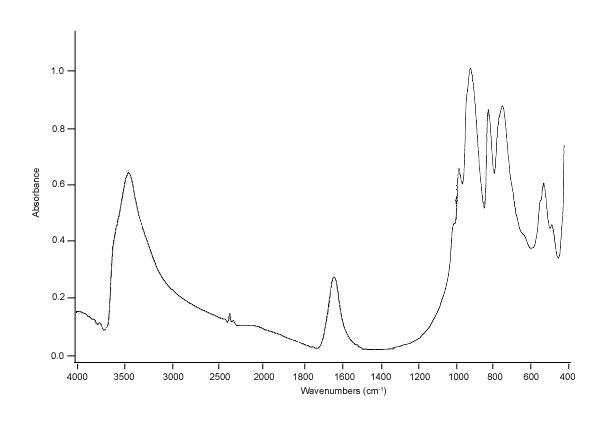

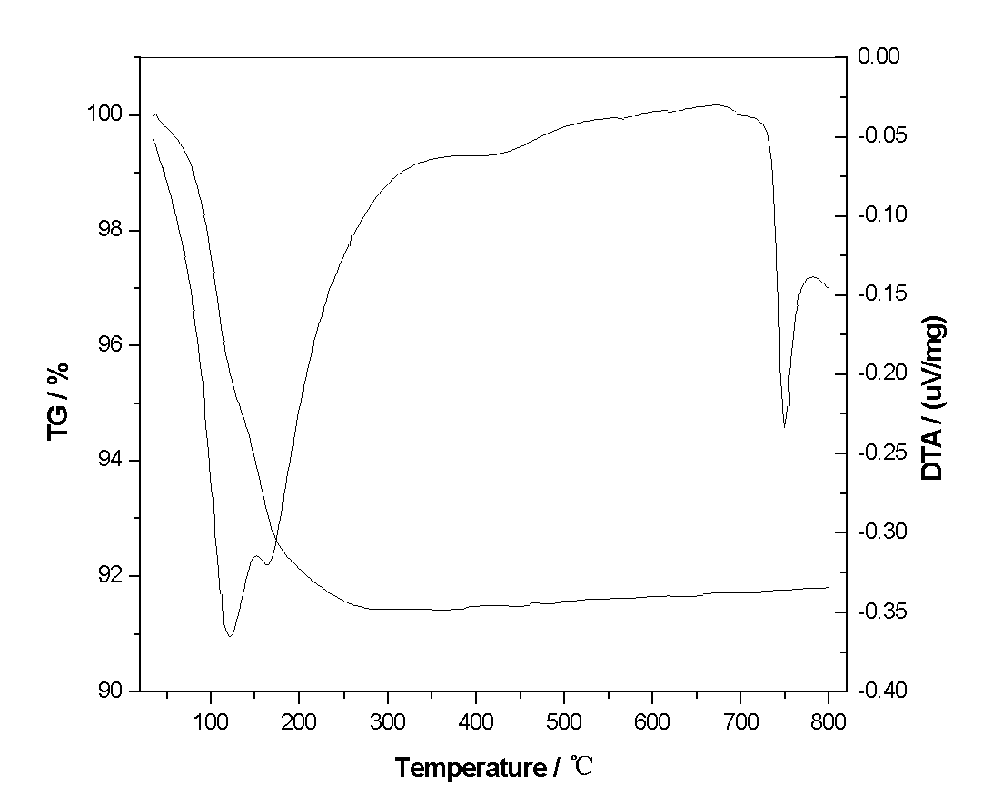


S.Fig.5 TG-DTA curves of SiW11-Co-PO4.


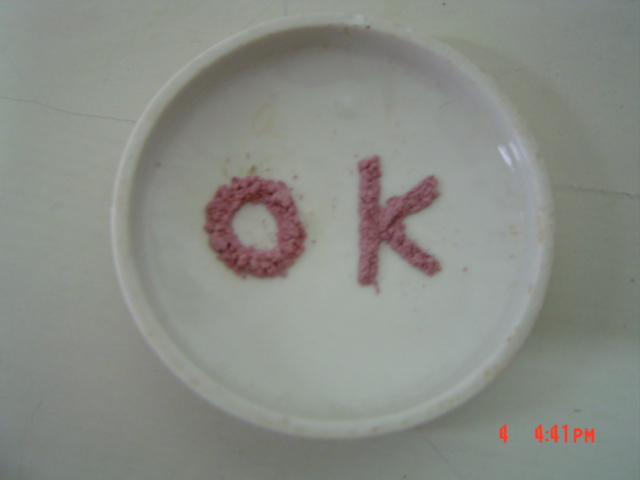


a


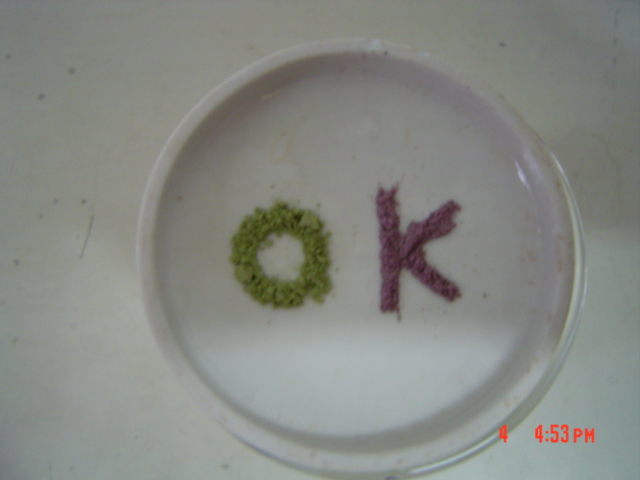


b

S. Fig. 6 The photos for SiW11Co (letter “O”) and SiW11Co-PO4 (letter “K”): before heating (a), after calcination at 520℃ for 30 min (b) and after calcination at 600℃ (c). Green powders are decomposed compounds.


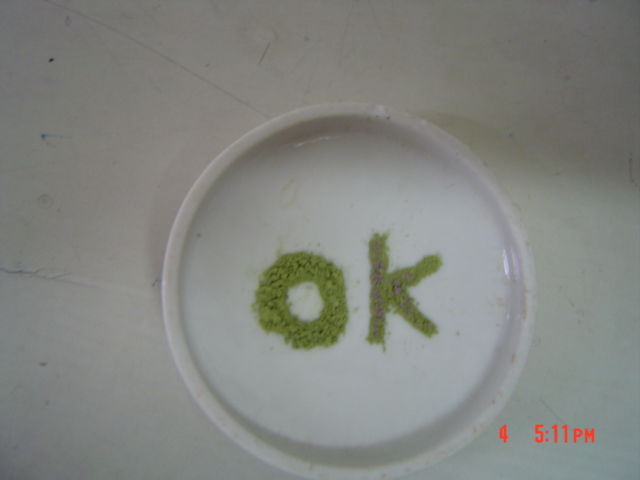


c

S.Fig.7 IR spectrum of [SiW11O39CoII (H2PO4)]n- after calcinations at *ca.*520℃ for 30 min.


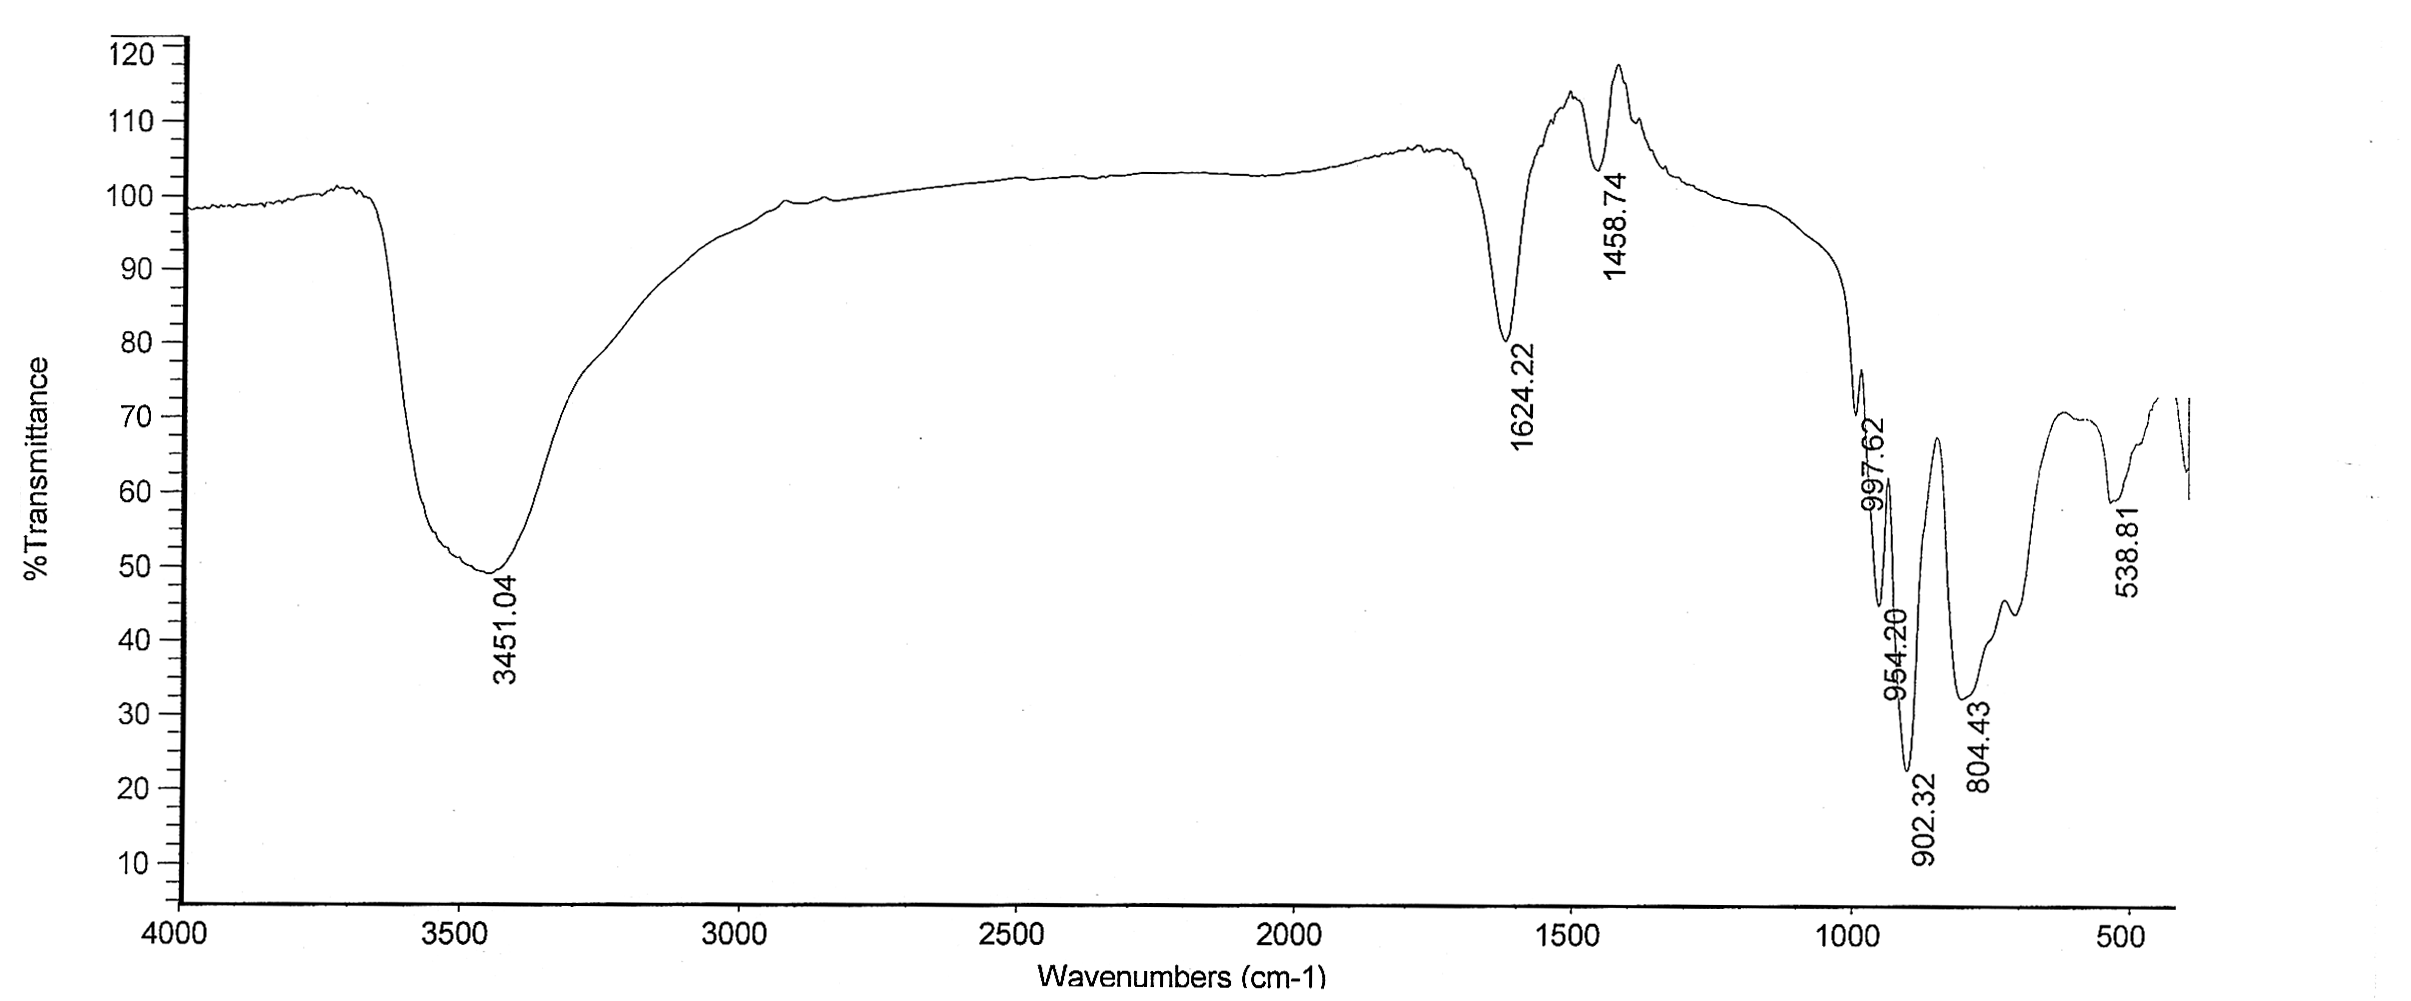

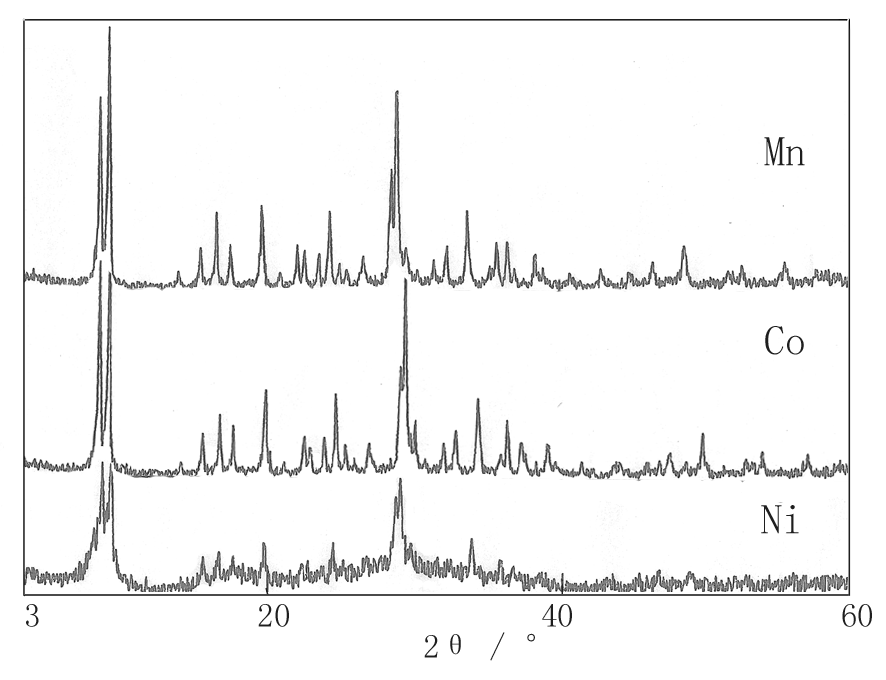


Fig 8 X-ray powder diffraction patterns for SiW11M-PO4 (M = CoII, MnII or NiII)

S.Table 1 Data of X-ray powder diffraction for -K4H3[SiW11O39Co(H2PO4 )]·15H2O


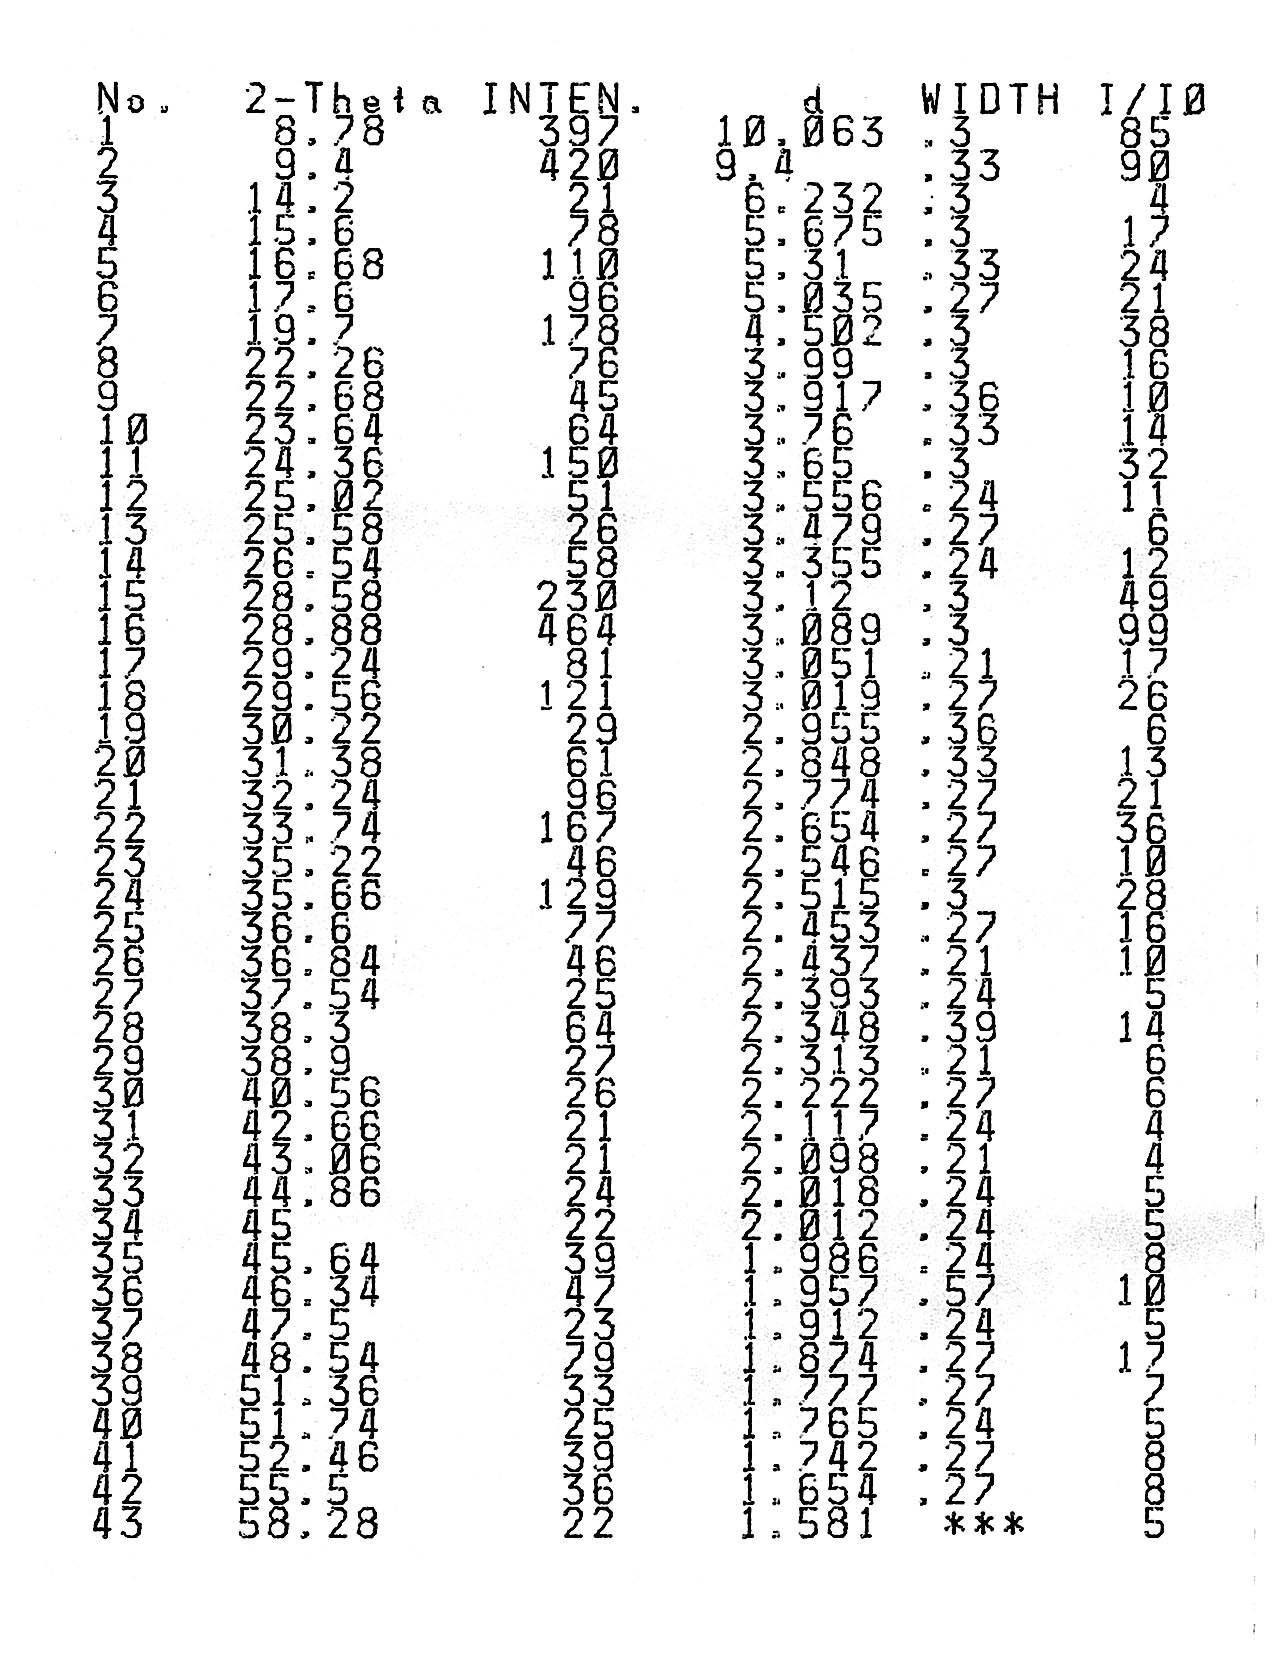

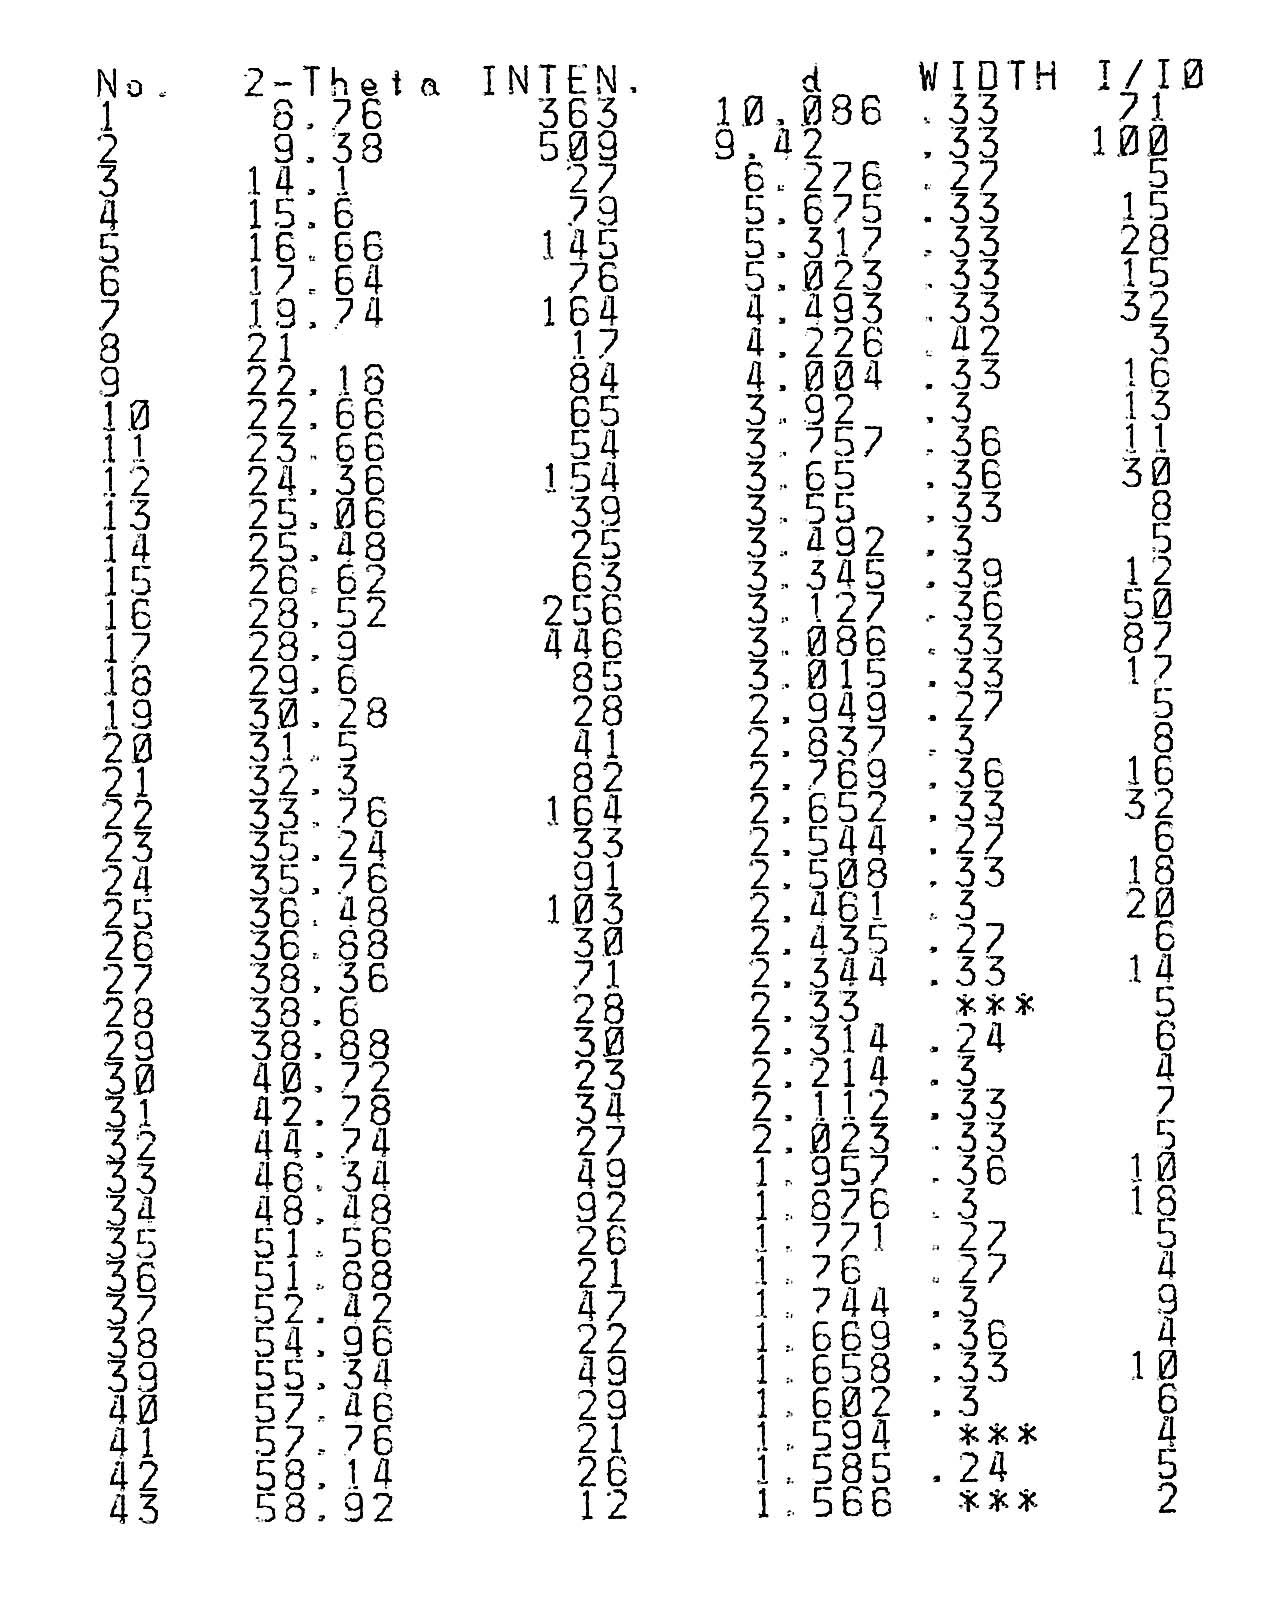


S.Table 2 Data of X-ray powder diffraction for -K4H3[SiW11O39Mn (H2PO4)]·11H2O

S.Table 3 Data of X-ray powder diffraction for -K5H2[SiW11O39Ni(H2PO4)]·8H2O


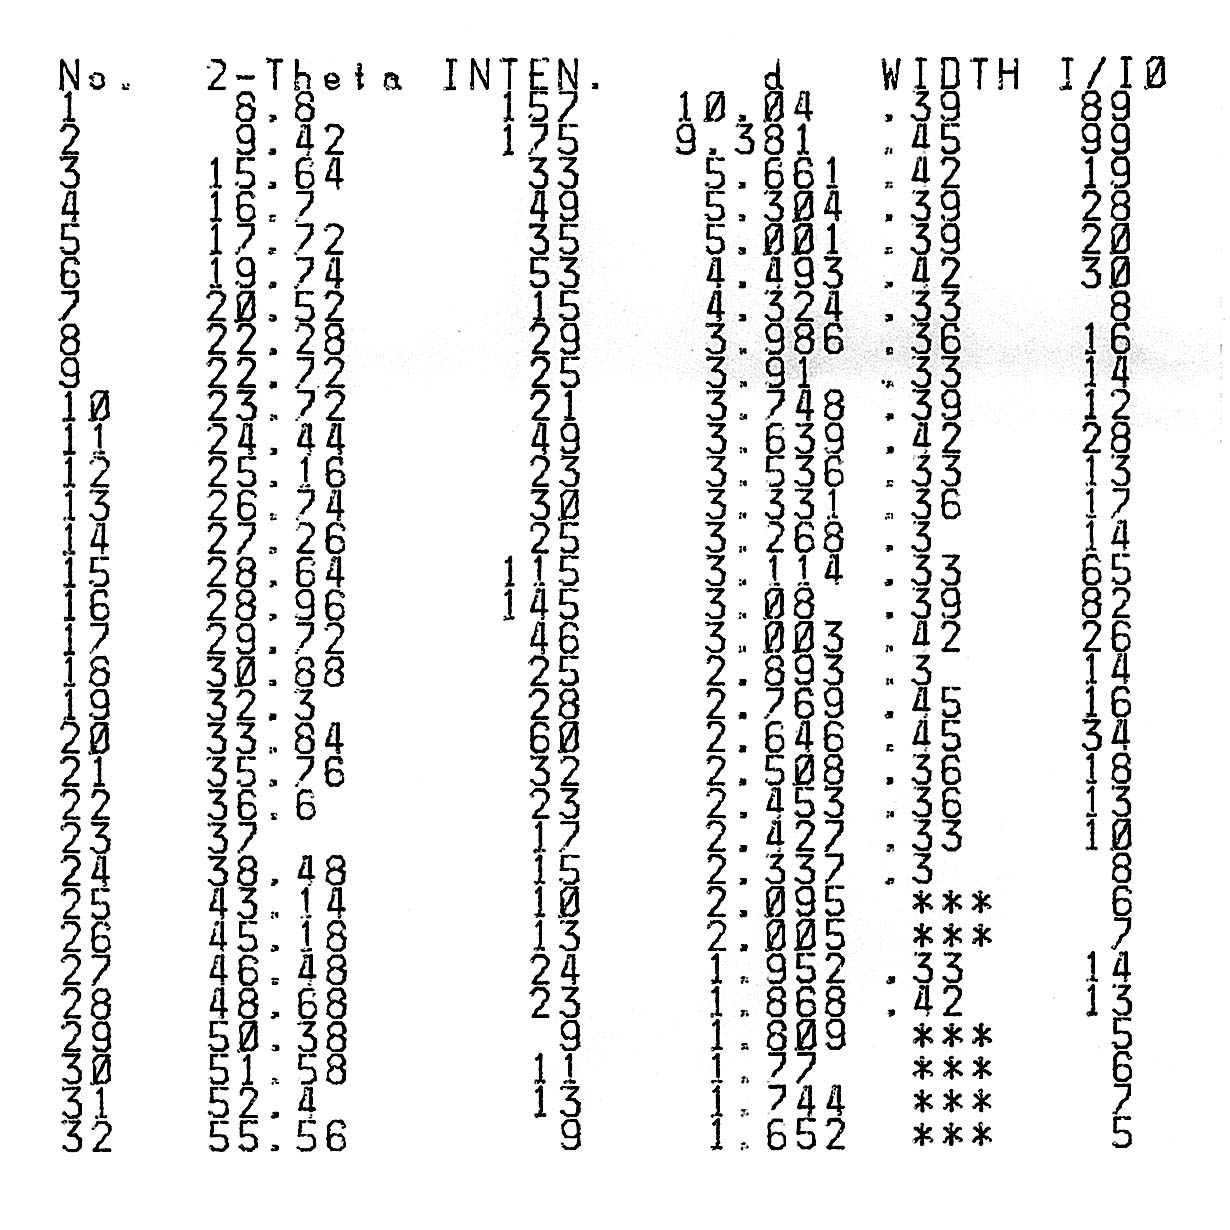

Supplement: b307947n.doc [file b307947n.doc]
